# Supplementary material for: Using fluorescently-labeled magnetic nanocomposites as a dual contrast agent for optical and magnetic resonance imaging
Source: Royal Society of Chemistry journal article supplement (doi:10.1039/c7bm00031f), 2017-01-01
Supplement: c7bm00031f1.pdf [file c7bm00031f1.pdf]

## Using fluorescently-labeled magnetic nanocomposite as a dual contrast agent for optical and magnetic resonance imaging

Taofeng Zhu<sup>a</sup>, Xiuqin Ma<sup>a</sup>, Ruhua Chen<sup>a</sup>, Zhijun Ge<sup>a</sup>, Jun Xu<sup>b\*</sup>, Xiaoke Shen<sup>b</sup>, Lei Jia<sup>b</sup>, Tao Zhou<sup>b</sup>, Yifeng Luo<sup>a,\*</sup>, Tieliang Ma<sup>a,\*</sup>

<sup>a</sup> The Affiliated Yixing Hospital of Jiangsu University, No.75, Tongzhenguan Road, Yixing, Jiangsu, 214200, China

<sup>b</sup> College of Chemistry and Chemical Engineering, Henan Polytechnic University, No. 2001 Shiji Street, Jiaozuo, Henan, 454000, China

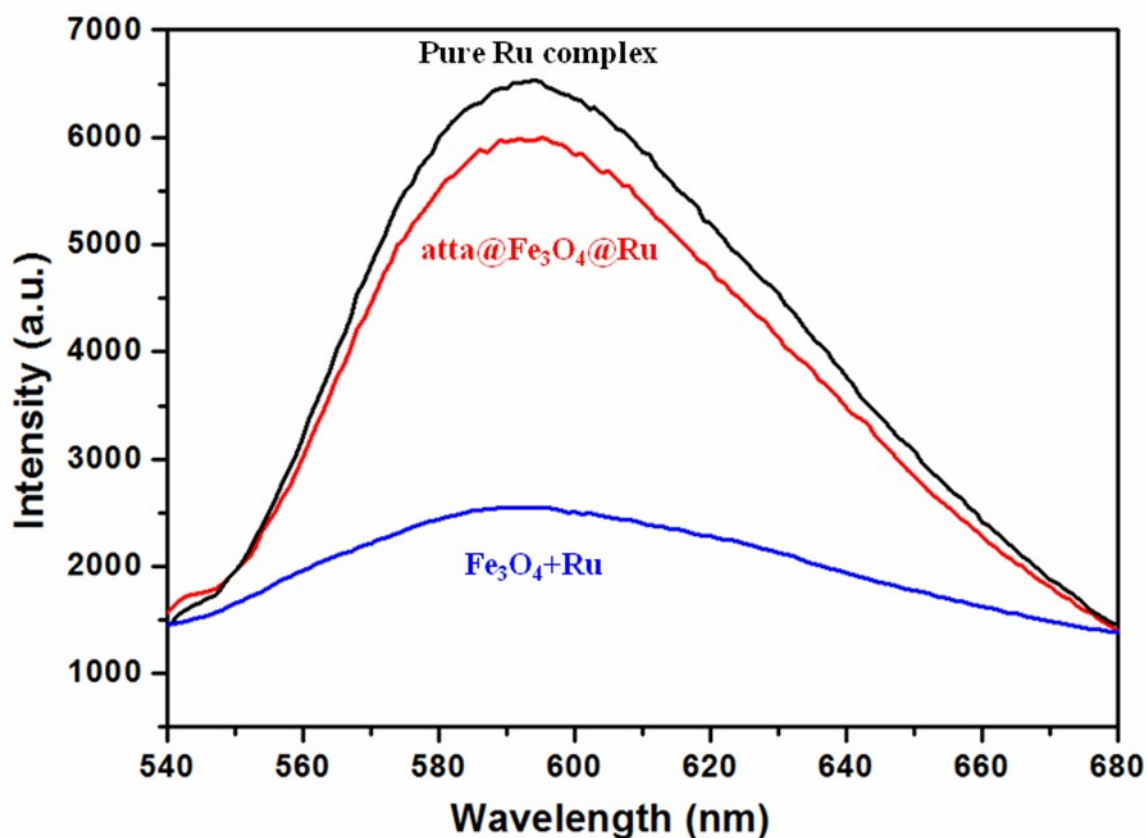

Fig. S1 The fluorescence intensity of the Pure Ru complex,  $\text{atta@Fe}_3\text{O}_4\text{@Ru}$  and  $\text{Fe}_3\text{O}_4\text{+Ru}$  nanocomposites.

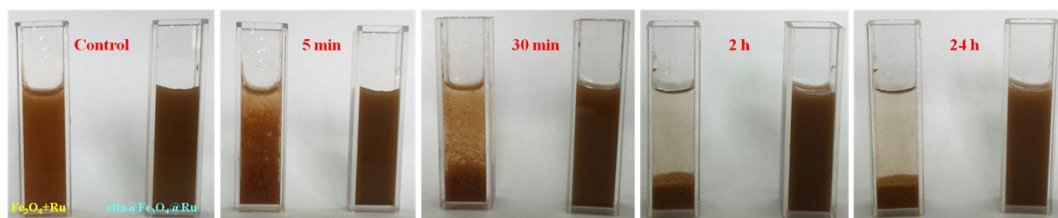

Fig. S2 The water dispersibility images of the  $\text{atta@Fe}_3\text{O}_4\text{@Ru}$  and  $\text{Fe}_3\text{O}_4\text{+Ru}$  nanocomposites.

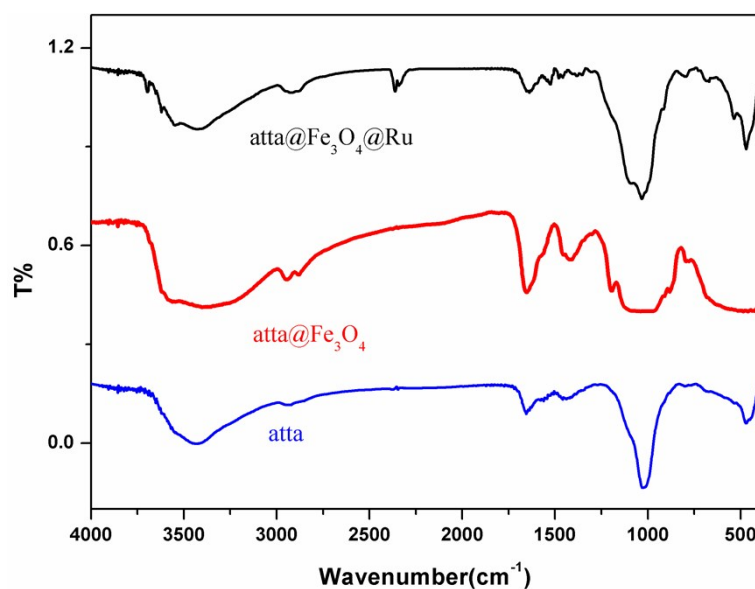

Fig. S3 The FTIR spectra of the pure  $\text{atta}$ ,  $\text{atta@Fe}_3\text{O}_4$  and  $\text{atta@Fe}_3\text{O}_4\text{@Ru}$ .
